# Supplementary material
Source: Springer Nature journal article supplement (https://www.springermedizin.de/resource/supplementary/12890_2008_107_MOESM1_ESM.pdf/9506000)

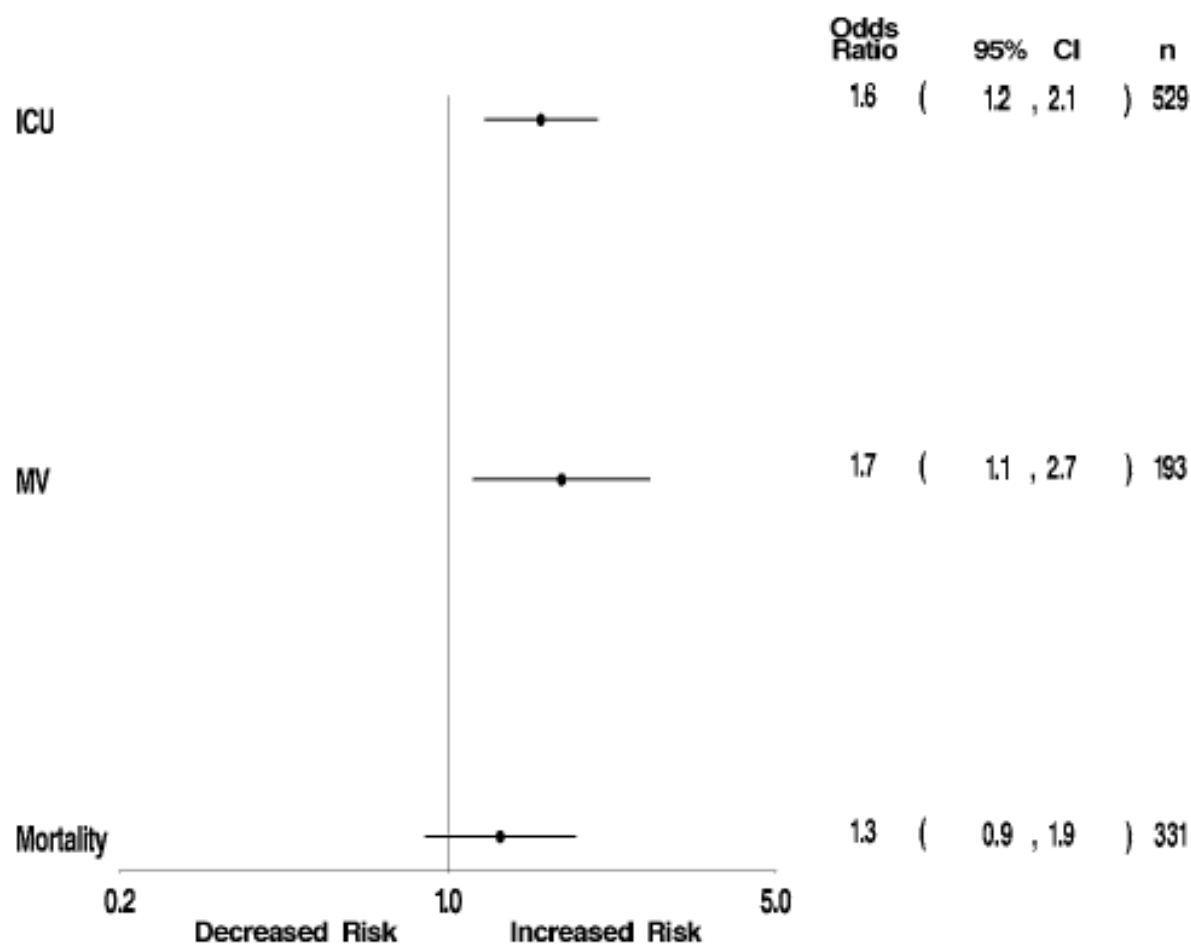

Supplement: MOESM1 [file 9506000]
